# Supplementary material for: Functional characterization of VirB/VirD4 and Icm/Dot type IV secretion systems from the plant-pathogenic bacterium Xanthomonas euvesicatoria
Source: PubMed Central journal article supplement (PMC10432156; doi:10.3389/fcimb.2023.1203159), 2023-08-01
Supplement: DataSheet_1.pdf [file DataSheet_1.pdf]

## *Supplementary Material*

### **Functional characterization of VirB/VirD4 and Icm/Dot type IV secretion systems from the plant-pathogenic bacterium *Xanthomonas euvesicatoria***

**Sabine Drehkopf<sup>1</sup>, Felix Scheibner<sup>2</sup> and Daniela Büttner<sup>1,\*</sup>**

\* Correspondence:

daniela.buettner@genetik.uni-halle.de

#### **Supplemental tables:**

Table S1: Bacterial strains and plasmids used in this study.

Table S2: Primers used in this study.

Table S3: Accession numbers and predicted functions of VirB/VirD4 proteins from *A. tumefaciens* and *Xanthomonas* spp.

Table S4: Sequences of predicted *vir* and *icm/dot* promoters from *X. euvesicatoria*.

Table S5: Accession numbers and predicted functions of Icm/Dot proteins from *L. pneumophila*.

Table S6: Transfer of plasmid pXCV38<sub>82-8</sub>::*spec<sup>R</sup>* from strain 82-8 into the recipient strain 85-10::*gent<sup>R</sup>*.

Table S7: XVIPCDs in T4S candidate substrates from *X. euvesicatoria*.

#### **Supplemental figure:**

Figure S1: Synthesis and immunological detection of T18 and T25 fusion proteins in *E. coli* strain JM109.

Figure S2: Results of BACTH assays with TraG from *X. euvesicatoria*.

**Table S1: Bacterial strains and plasmids used in this study**

| Strain or plasmid                                                                                     | Relevant characteristics <sup>1</sup>                                                                                                                                                                                                                | Reference or source                      |
|-------------------------------------------------------------------------------------------------------|------------------------------------------------------------------------------------------------------------------------------------------------------------------------------------------------------------------------------------------------------|------------------------------------------|
| <b><i>Xanthomonas euvesicatoria</i></b>                                                               |                                                                                                                                                                                                                                                      |                                          |
| 85-10                                                                                                 | Pepper-race 2; wild type; Rif <sup>r</sup>                                                                                                                                                                                                           | Canteros, 1990; Kousik and Ritchie, 1998 |
| 85-10Δ <i>virB4</i>                                                                                   | <i>virB4</i> deletion mutant of strain 85-10                                                                                                                                                                                                         | This study                               |
| 85-10Δ <i>virD4</i>                                                                                   | <i>virD4</i> deletion mutant of strain 85-10                                                                                                                                                                                                         | This study                               |
| 85-10Δ <i>virG</i>                                                                                    | <i>virG</i> deletion mutant of strain 85-10                                                                                                                                                                                                          | This study                               |
| 85-10Δ <i>virA</i>                                                                                    | <i>virA</i> deletion mutant of strain 85-10                                                                                                                                                                                                          | This study                               |
| 85-10Δ <i>virB11</i> Δ <i>virB1</i>                                                                   | <i>virB11</i> and <i>virB1</i> deletion mutant of strain 85-10                                                                                                                                                                                       | This study                               |
| 85-10Δ <i>virD4</i> Δ <i>virB11</i> Δ <i>virB1</i>                                                    | <i>virD4</i> , <i>virB11</i> and <i>virB1</i> deletion mutant of strain 85-10                                                                                                                                                                        | This study                               |
| 85-10<br>Δ <i>virD4</i> Δ <i>virB11</i> Δ <i>virB1</i> Δ <i>virB4</i>                                 | Derivative of strain 85-10 deleted in <i>virD4</i> , <i>virB11</i> , <i>virB1</i> and <i>virB4</i>                                                                                                                                                   | This study                               |
| 85-10<br>Δ <i>virB6</i> Δ <i>virB8</i> Δ <i>virB9</i> Δ <i>virB10</i>                                 | Derivative of strain 85-10 deleted in <i>virB6</i> , <i>virB8</i> , <i>virB9</i> and <i>virB10</i>                                                                                                                                                   | This study                               |
| 85-10<br>Δ <i>virB6</i> Δ <i>virB8</i> Δ <i>virB9</i> Δ <i>virB10</i><br>Δ <i>icmE</i> Δ <i>dotCB</i> | Derivative of strain 85-10 deleted in <i>virB6</i> , <i>virB8</i> , <i>virB9</i> , <i>virB10</i> , <i>icmE</i> , <i>dotC</i> and <i>dotB</i>                                                                                                         | This study                               |
| 85-10Δ <i>dotCB</i>                                                                                   | Derivative of strain 85-10 deleted in <i>dotC</i> and <i>dotB</i>                                                                                                                                                                                    | This study                               |
| 85-10Δ <i>icmE</i>                                                                                    | <i>icmE</i> deletion mutant of strain 85-10                                                                                                                                                                                                          | This study                               |
| 85-10Δ <i>dotCB</i> Δ <i>icmE</i>                                                                     | Derivative of strain 85-10 deleted in <i>dotC</i> , <i>dotB</i> and <i>icmE</i>                                                                                                                                                                      | This study                               |
| 85-10Δ <i>virB4</i> Δ <i>icmE</i>                                                                     | Derivative of strain 85-10 deleted in <i>virB4</i> and <i>icmE</i>                                                                                                                                                                                   | This study                               |
| 85-10Δ <i>dotCB</i> Δ <i>icmE</i> Δ <i>virB4</i>                                                      | Derivative of strain 85-10 deleted in <i>dotC</i> , <i>dotB</i> , <i>icmE</i> and <i>virB4</i>                                                                                                                                                       | This study                               |
| 85-10:: <i>kan</i> <sup>R</sup>                                                                       | Insertion mutant of 85-10 carrying <i>gfp</i> and the kanamycin resistance gene under control of the gentamycin resistance promoter of pBRM on pXCV183; Rif <sup>r</sup> , Km <sup>r</sup>                                                           | This study                               |
| 85-10Δ <i>xopQ</i>                                                                                    | <i>xopQ</i> deletion mutant of strain 85-10                                                                                                                                                                                                          | Adlung et al., 2016                      |
| 82-8                                                                                                  | Pepper-race 1; wild type; Rif <sup>r</sup>                                                                                                                                                                                                           | Bonas et al., 1989                       |
| 85-10:: <i>gent</i> <sup>R</sup>                                                                      | Insertion mutant of 85-10 carrying the gentamycin resistance gene under control of the <i>lac</i> promoter in the <i>hpaFG</i> region; Rif <sup>r</sup> , Gm <sup>r</sup>                                                                            | This study                               |
| 85-10Δ <i>virD4</i> :: <i>gent</i> <sup>R</sup>                                                       | Insertion mutant of 85-10Δ <i>virD4</i> carrying the gentamycin resistance gene under control of the <i>lac</i> promoter in the <i>hpaFG</i> region; Rif <sup>r</sup> , Gm <sup>r</sup>                                                              | This study                               |
| 85-10Δ <i>virB4</i> :: <i>gent</i> <sup>R</sup>                                                       | Insertion mutant of 85-10Δ <i>virB4</i> carrying the gentamycin resistance gene under control of the <i>lac</i> promoter in the <i>hpaFG</i> region; Rif <sup>r</sup> , Gm <sup>r</sup>                                                              | This study                               |
| <b><i>E. coli</i></b>                                                                                 |                                                                                                                                                                                                                                                      |                                          |
| OneShot®TOP10                                                                                         | F <sup>-</sup> <i>mcrA</i> Δ( <i>mrr</i> - <i>hsdRMS</i> - <i>mcrBC</i> ) φ80 <i>lacZ</i> ΔM15 Δ <i>lacX74</i> <i>recA1</i> <i>ara</i> Δ139 Δ( <i>ara-leu</i> )7697 <i>galU</i> <i>galK</i> <i>rpsL</i> <i>endA1</i> <i>nupG</i> (Str <sup>r</sup> ) | Invitrogen                               |
| Dh5α λpir                                                                                             | F <sup>-</sup> <i>recA</i> <i>hsdR17</i> ( <i>r<sub>K</sub></i> <sup>-</sup> , <i>m<sub>K</sub></i> <sup>+</sup> ) φ80 <i>dlacZ</i> DM15 [λ <i>pir</i> ]                                                                                             | Ménard et al., 1993                      |
| BL21(DE3)                                                                                             | F <sup>-</sup> <i>ompt</i> <i>hsdS20</i> ( <i>r<sub>S</sub></i> <sup>-</sup> , <i>m<sub>S</sub></i> <sup>-</sup> ) <i>gal</i>                                                                                                                        | Stratagene                               |
| Rosetta DE3 pLysS                                                                                     |                                                                                                                                                                                                                                                      |                                          |
| JM109                                                                                                 | F <sup>-</sup> , <i>traD36</i> <i>proA</i> + <i>B</i> + <i>lacIq</i> Δ( <i>lacZ</i> )M15/ Δ( <i>lac-proAB</i> ) <i>glnV44</i> <i>e14</i> - <i>gyrA96</i> <i>recA1</i> <i>relA1</i> <i>endA1</i> <i>thi</i> <i>hsdR17</i>                             | Yanisch-Perron et al., 1985              |
| BTH101                                                                                                | F <sup>-</sup> , <i>cya-99</i> , <i>araD139</i> , <i>galE15</i> , <i>galK16</i> , <i>rpsL1</i> ( <i>StrR</i> ), <i>hsdR2</i> , <i>mcrA1</i> , <i>mcrB1</i>                                                                                           | Euromedex; Battesti and Bouveret, 2012   |
| <b>Plasmids</b>                                                                                       |                                                                                                                                                                                                                                                      |                                          |
| pRK2013                                                                                               | ColE1 replicon, TraRK <sup>+</sup> Mob <sup>+</sup> ; Km <sup>r</sup>                                                                                                                                                                                | Figurski and Helinski, 1979              |
| pBBR1MCS-5                                                                                            | Broad-host-range vector; <i>lac</i> promoter; Gm <sup>r</sup>                                                                                                                                                                                        | Kovach et al., 1995                      |
| pBRM                                                                                                  | Golden Gate-compatible derivative of pBBR1MCS-5                                                                                                                                                                                                      | Szczesny et al., 2010                    |
| pBRM-P                                                                                                | Golden Gate-compatible derivative of pBBR1MCS-5 without promoter                                                                                                                                                                                     | Szczesny et al., 2010                    |

|                                      |                                                                                                                                                                                                                                                                                               |                                    |
|--------------------------------------|-----------------------------------------------------------------------------------------------------------------------------------------------------------------------------------------------------------------------------------------------------------------------------------------------|------------------------------------|
| pBRM-P(stop)                         | Golden Gate-compatible derivative of pBRM-P with a stop codon in the 3' region                                                                                                                                                                                                                | Hausner et al., 2013               |
| pBRNM                                | Golden Gate-compatible derivative of pBBR1MCS-5 with 3 x c-Myc-encoding sequence in the 5' region of the inserted gene and a stop codon in the 3' region; Gm <sup>r</sup>                                                                                                                     | This study                         |
| pBRM-P+T                             | Golden Gate-compatible derivative of pBBR1MCS-5 without promoter upstream of the cloning sites and an <i>rrnB T1</i> terminator                                                                                                                                                               | Helm and Schmidtke, unpublished    |
| pDSK602                              | Broad-host-range vector containing a <i>lacUV5</i> promoter; Sm <sup>r</sup>                                                                                                                                                                                                                  | Murillo et al., 1994               |
| pICH41021                            | Derivative of pUC19 with mutated <i>BsaI</i> site; Ap <sup>r</sup>                                                                                                                                                                                                                            | Hausner et al., 2019               |
| pUC57                                | Classical cloning vector with mutated <i>BsaI</i> site; Ap <sup>r</sup>                                                                                                                                                                                                                       | Thermo Fisher Scientific           |
| pLAND                                | Derivative of pOK1 containing fragments of the <i>hpaFG</i> region, the <i>lac</i> promoter and a triple <i>c-Myc</i> epitope-encoding sequence; Sm <sup>r</sup>                                                                                                                              | Lorenz et al., 2012                |
| pLAND-P                              | Derivative of pOK1 containing fragments of the <i>hpaFG</i> region, a triple <i>c-Myc</i> epitope-encoding sequence and lacking a promoter upstream of the <i>BsaI</i> sites; Sm <sup>r</sup>                                                                                                 | Lorenz et al., 2012                |
| pOGG2                                | Golden Gate-compatible derivative of suicide vector pOK1, <i>sacB sacQ mobRK2 oriR6K</i> ; Sm <sup>r</sup>                                                                                                                                                                                    | Schulze et al., 2012               |
| pAGM9121                             | pUC19-derived vector, <i>lacZα</i> fragment flanked by <i>BpiI</i> sites (CTCA/CGAG); GGAG/CGCT <i>BsaI</i> fusion sites; Sm <sup>r</sup>                                                                                                                                                     | Addgene #51833; Weber et al., 2011 |
| pICH47732                            | Derived from pUC19, level 1 for promoters; <i>lacZα</i> fragment flanked by <i>BsaI</i> sites (GGAG/CGCT); TGCC/GCAA <i>BpiI</i> fusion sites; Ap <sup>r</sup>                                                                                                                                | Addgene #48000; Weber et al., 2011 |
| pICH79631                            | Derived from pICH50251, containing dTALE-2 with stop-codon for position 2 in level M; GCAA/ACTA <i>BpiI</i> fusion sites; Ap <sup>r</sup>                                                                                                                                                     | Gift from S. Marillonnet           |
| pICH50122                            | Derived from pUC19, end linker for position 3 contains a terminator sequence; ACTA/ GGGA <i>BpiI</i> fusion sites; Ap <sup>r</sup>                                                                                                                                                            | Gift from S. Marillonnet           |
| pICH77739                            | Level 2 vector derived from pBIN19, RK2 ori, <i>lacZα</i> fragment flanked by <i>BpiI</i> sites; Km <sup>r</sup>                                                                                                                                                                              | Weber et al., 2011                 |
| pKT25 <sub>GG</sub>                  | Golden Gate-compatible derivative of pKT25 encoding the T25 fragment downstream of a <i>lac</i> promoter and in frame with a C-terminal FLAG epitope-encoding sequence; contains <i>lacP-eforRed</i> flanked by <i>BsaI</i> sites downstream of the <i>T25-FLAG</i> fragment; Km <sup>r</sup> | Otten and Büttner, 2021            |
| pKNT25 <sub>GG</sub>                 | Golden Gate-compatible derivative of pKNT25, encodes the T25 fragment in frame with an N-terminal FLAG epitope-encoding sequence downstream of the <i>lac</i> promoter, contains <i>lacP-eforRed</i> flanked by <i>BsaI</i> sites upstream of the <i>T25-FLAG</i> fragment; Km <sup>r</sup>   | Otten and Büttner, 2021            |
| pUT18 <sub>GG</sub>                  | Golden Gate-compatible derivative of pUT18 containing <i>lacP-eforRed</i> flanked by <i>BsaI</i> sites upstream of the <i>FLAG-T18</i> fragment; Gm <sup>R</sup>                                                                                                                              | Otten and Büttner, 2021            |
| pUT18 <sub>C<sub>GG</sub></sub>      | Golden Gate-compatible derivative of pUT18C containing <i>lacP-eforRed</i> flanked by <i>BsaI</i> sites downstream of the <i>T18-FLAG</i> fragment; Gm <sup>R</sup>                                                                                                                           | Otten and Büttner, 2021            |
| pICH41021-virD4 <sub>1-950</sub>     | Derivative of pICH41021 containing bp 1 - 950 of <i>virD4</i> flanked by <i>BsaI</i> sites with TATG and GCCT overhangs                                                                                                                                                                       | This study                         |
| pICH41021-virD4 <sub>951-1450</sub>  | Derivative of pICH41021 containing bp 951 - 1450 of <i>virD4</i> flanked by <i>BsaI</i> sites with GCCT and GTCA overhangs                                                                                                                                                                    | This study                         |
| pICH41021-virD4 <sub>1451-1671</sub> | Derivative of pICH41021 containing bp 1451 – 1671 of <i>virD4</i> flanked by <i>BsaI</i> sites with GTCA and GGTG overhangs                                                                                                                                                                   | This study                         |

|                                                  |                                                                                                                                                       |                                 |
|--------------------------------------------------|-------------------------------------------------------------------------------------------------------------------------------------------------------|---------------------------------|
| pUC57-XCV4361 <sub>prom</sub>                    | Derivative of pUC57 containing the putative promoter of XCV4361 flanked by <i>Bsal</i> sites with ATTC and TATG overhangs                             | This study                      |
| pICH41021-traI                                   | Derivative of pICH41021 containing <i>traI</i> flanked by <i>Bsal</i> sites with TATG and GGTG fusion sites                                           | This study                      |
| pUC57-XCV0332                                    | Derivative of pUC57 containing XCV0332 flanked by <i>Bsal</i> sites with TATG and GGTG fusion sites                                                   | This study                      |
| pICH41021-XCV3751                                | Derivative of pICH41021 containing <i>XCV3751</i> flanked by <i>Bsal</i> sites with TATG and GGTG fusion sites                                        | This study                      |
| pUC57-XCV1120                                    | Derivative of pUC57 containing <i>XCV1120</i> flanked by <i>Bsal</i> sites with TATG and GGTG fusion sites                                            | This study                      |
| pICH41021-virB10                                 | Derivative of pICH41021 containing <i>virB10</i> flanked by <i>Bsal</i> sites with TATG and GGTG fusion sites                                         | This study                      |
| pICH41021-virB11                                 | Derivative of pICH41021 containing <i>virB11</i> flanked by <i>Bsal</i> sites with TATG and GGTG fusion sites                                         | This study                      |
| pICH41021- virB7                                 | Derivative of pICH41021 containing <i>virB7</i> flanked by <i>Bsal</i> sites with TATG and GGTG fusion sites                                          | This study                      |
| pICH41021-dotB                                   | Derivative of pICH41021 containing <i>dotB</i> flanked by <i>Bsal</i> sites with TATG and GGTG fusion sites                                           | This study                      |
| pICH41021-dotO <sub>1-109</sub>                  | Derivative of pICH41021 containing bp 1 - 109 of <i>dotO</i> flanked by <i>Bsal</i> sites with TATG and AGAC overhangs                                | This study                      |
| pICH41021-dotO <sub>110-3048</sub>               | Derivative of pICH41021 containing bp 110 - 3048 of <i>dotO</i> flanked by <i>Bsal</i> sites with AGAC and GTG overhangs                              | This study                      |
| pICH41021-icmE <sub>1-645</sub>                  | Derivative of pICH41021 containing bp 1 - 645 of <i>icmE</i> flanked by <i>Bsal</i> sites with TATG and ACGA overhangs                                | This study                      |
| pICH41021-icmE <sub>646-796</sub>                | Derivative of pICH41021 containing bp 646 - 796 of <i>icmE</i> flanked by <i>Bsal</i> sites with ACGA and GACG overhangs                              | This study                      |
| pICH41021-icmE <sub>797-1248</sub>               | Derivative of pICH41021 containing bp 797 - 1248 of <i>icmE</i> flanked by <i>Bsal</i> sites with GACG and GGTG overhangs                             | This study                      |
| pICH41021-dotL <sub>1-1460</sub>                 | Derivative of pICH41021 containing bp 1 - 1460 of <i>dotL</i> flanked by <i>Bsal</i> sites with TATG and ACCG overhangs                               | This study                      |
| pICH41021-dotL <sub>1461-2001</sub>              | Derivative of pICH41021 containing bp 1461 - 2001 of <i>dotL</i> flanked by <i>Bsal</i> sites with ACCG and GCGG overhangs                            | This study                      |
| pICH41021-dotL <sub>2002-2568</sub>              | Derivative of pICH41021 containing bp 2002 - 2568 of <i>dotL</i> flanked by <i>Bsal</i> sites with GCGG and GGTG overhangs                            | This study                      |
| pXCV38 <sub>82-8::spec<sup>R</sup></sub>         | Derivative of the native plasmid pXCV38 from <i>X. euvesicatoria</i> strain 82-8 containing a spectinomycin resistance gene inserted in <i>avrBs3</i> | Bonas et al., 1989              |
| <b>Expression constructs and suicide vectors</b> |                                                                                                                                                       |                                 |
| pDSF300                                          | Derivative of pDSK602 encoding AvrBs3                                                                                                                 | Van den Ackerveken et al., 1996 |
| pBRNM-XCV3751                                    | Derivative of pBRNM encoding c-Myc-XCV3751 under control of the <i>lac</i> promoter                                                                   | This study                      |
| pBRNM-XCV1120                                    | Derivative of pBRNM encoding c-Myc-XCV1120 under control of the <i>lac</i> promoter                                                                   | This study                      |
| pBRNM-XCV0332                                    | Derivative of pBRNM encoding c-Myc-XCV0332 under control of the <i>lac</i> promoter                                                                   | This study                      |
| pBRM-P(stop)-XCV4361 <sub>prom</sub> -c-Myc-traI | Derivative of pBRM-P(stop) encoding c-Myc-TraI under control of the putative <i>XCV4361</i> promoter                                                  | This study                      |
| pLAND-virB4                                      | Derivative of pLAND containing <i>virB4</i>                                                                                                           | This study                      |
| pLAND-P-XCV0160 <sub>prom</sub> -icmE            | Derivative of pLAND-P containing <i>icmE</i> under the control of the XCV0160 promoter                                                                | This study                      |
| pLAND-gent <sup>R</sup>                          | Derivative of pLAND containing the gentamycin resistance gene cassette from vector pBRM                                                               | This study                      |

|                                     |                                                                                                                                                            |            |
|-------------------------------------|------------------------------------------------------------------------------------------------------------------------------------------------------------|------------|
| pOGG2-kan <sup>R</sup> gfp(pXCV183) | Derivative of pOGG2 carrying the flanking sequences of nucleotide position 2831 in pXCV183 and containing the kanamycin resistance and the <i>gfp</i> gene | This study |
| pOGG2-ΔvirB4                        | Derivative of pOGG2 carrying flanking sequences of <i>virB4</i>                                                                                            | This study |
| pOGG2-ΔvirD4                        | Derivative of pOGG2 carrying flanking sequences of <i>virD4</i>                                                                                            | This study |
| pOGG2-ΔvirG                         | Derivative of pOGG2 carrying flanking sequences of <i>virG</i>                                                                                             | This study |
| pOGG2-ΔvirA                         | Derivative of pOGG2 carrying flanking sequences of <i>virA</i>                                                                                             | This study |
| pOGG2-ΔvirB11ΔvirB1                 | Derivative of pOGG2 carrying flanking sequences of <i>virB11</i> and <i>virB1</i>                                                                          | This study |
| pOGG2-ΔvirB6ΔvirB8ΔvirB9ΔvirB10     | Derivative of pOGG2 carrying flanking sequences of <i>virB6</i> and <i>virB10</i>                                                                          | This study |
| pOGG2-ΔicmE                         | Derivative of pOGG2 carrying flanking sequences of <i>icmE</i>                                                                                             | This study |
| pOGG2-ΔdotCB                        | Derivative of pOGG2 carrying flanking sequences of <i>dotC</i> and <i>dotB</i>                                                                             | This study |
| <b>BACTH constructs</b>             |                                                                                                                                                            |            |
| pUT18 <sub>GG</sub> -virD4          | Derivative of pUT18 <sub>GG</sub> encoding VirD4-FLAG-T18                                                                                                  | This study |
| pUT18 <sub>CGG</sub> -virD4         | Derivative of pUT18 <sub>CGG</sub> encoding T18-FLAG-VirD4                                                                                                 | This study |
| pKNT25 <sub>GG</sub> -virD4         | Derivative of pKNT25- <sub>GG</sub> encoding VirD4-FLAG-T25                                                                                                | This study |
| pKT25 <sub>GG</sub> -virD4          | Derivative of pKT25 <sub>GG</sub> encoding T25-FLAG-VirD4                                                                                                  | This study |
| pUT18 <sub>GG</sub> -dotL           | Derivative of pUT18 <sub>GG</sub> encoding DotL-FLAG-T18                                                                                                   | This study |
| pUT18 <sub>CGG</sub> -dotL          | Derivative of pUT18 <sub>CGG</sub> encoding T18-FLAG-DotL                                                                                                  | This study |
| pKNT25 <sub>GG</sub> -dotL          | Derivative of pKNT25- <sub>GG</sub> encoding DotL-FLAG-T25                                                                                                 | This study |
| pKT25 <sub>GG</sub> -dotL           | Derivative of pKT25 <sub>GG</sub> encoding T25-FLAG-DotL                                                                                                   | This study |
| pUT18 <sub>GG</sub> -XCV3751        | Derivative of pUT18 <sub>GG</sub> encoding XCV3751-FLAG-T18                                                                                                | This study |
| pUT18 <sub>CGG</sub> -XCV3751       | Derivative of pUT18 <sub>CGG</sub> encoding T18-FLAG-XCV3751                                                                                               | This study |
| pKNT25 <sub>GG</sub> -XCV3751       | Derivative of pKNT25- <sub>GG</sub> encoding XCV3751-FLAG-T25                                                                                              | This study |
| pKT25 <sub>GG</sub> -XCV3751        | Derivative of pKT25 <sub>GG</sub> encoding T25-FLAG-XCV3751                                                                                                | This study |
| pUT18 <sub>GG</sub> -XCV0332        | Derivative of pUT18 <sub>GG</sub> encoding XCV0332-FLAG-T18                                                                                                | This study |
| pUT18 <sub>CGG</sub> -XCV0332       | Derivative of pUT18 <sub>CGG</sub> encoding T18-FLAG-XCV0332                                                                                               | This study |
| pKNT25 <sub>GG</sub> -XCV0332       | Derivative of pKNT25- <sub>GG</sub> encoding XCV0332-FLAG-T25                                                                                              | This study |
| pKT25 <sub>GG</sub> -XCV0332        | Derivative of pKT25 <sub>GG</sub> encoding T25-FLAG-XCV0332                                                                                                | This study |
| pUT18 <sub>GG</sub> -XCV1120        | Derivative of pUT18 <sub>GG</sub> encoding XCV1120-FLAG-T18                                                                                                | This study |
| pUT18 <sub>CGG</sub> -XCV1120       | Derivative of pUT18 <sub>CGG</sub> encoding T18-FLAG-XCV1120                                                                                               | This study |
| pKNT25 <sub>GG</sub> -XCV1120       | Derivative of pKNT25- <sub>GG</sub> encoding XCV1120-FLAG-T25                                                                                              | This study |
| pKT25 <sub>GG</sub> -XCV1120        | Derivative of pKT25 <sub>GG</sub> encoding T25-FLAG-XCV1120                                                                                                | This study |
| pUT18 <sub>GG</sub> -traI           | Derivative of pUT18 <sub>GG</sub> encoding TraI-FLAG-T18                                                                                                   | This study |
| pUT18 <sub>CGG</sub> -traI          | Derivative of pUT18 <sub>CGG</sub> encoding T18-FLAG-TraI                                                                                                  | This study |
| pKNT25 <sub>GG</sub> -traI          | Derivative of pKNT25- <sub>GG</sub> encoding TraI-FLAG-T25                                                                                                 | This study |
| pKT25 <sub>GG</sub> -traI           | Derivative of pKT25 <sub>GG</sub> encoding T25-FLAG-TraI                                                                                                   | This study |
| pUT18 <sub>GG</sub> -virB10         | Derivative of pUT18 <sub>GG</sub> encoding VirB10-FLAG-T18                                                                                                 | This study |
| pUT18 <sub>CGG</sub> -virB10        | Derivative of pUT18 <sub>CGG</sub> encoding T18-FLAG-VirB10                                                                                                | This study |
| pKNT25 <sub>GG</sub> -virB10        | Derivative of pKNT25- <sub>GG</sub> encoding VirB10-FLAG-T25                                                                                               | This study |
| pKT25 <sub>GG</sub> -virB10         | Derivative of pKT25 <sub>GG</sub> encoding T25-FLAG-VirB10                                                                                                 | This study |
| pUT18 <sub>GG</sub> -virB11         | Derivative of pUT18 <sub>GG</sub> encoding VirB11-FLAG-T18                                                                                                 | This study |
| pUT18 <sub>CGG</sub> -virB11        | Derivative of pUT18 <sub>CGG</sub> encoding T18-FLAG-VirB11                                                                                                | This study |
| pKNT25 <sub>GG</sub> -virB11        | Derivative of pKNT25- <sub>GG</sub> encoding VirB11-FLAG-T25                                                                                               | This study |
| pKT25 <sub>GG</sub> -virB11         | Derivative of pKT25 <sub>GG</sub> encoding T25-FLAG-VirB11                                                                                                 | This study |
| pUT18 <sub>GG</sub> -virB7          | Derivative of pUT18 <sub>GG</sub> encoding VirB7-FLAG-T18                                                                                                  | This study |

|                                                |                                                                                                                                                                                     |                                  |
|------------------------------------------------|-------------------------------------------------------------------------------------------------------------------------------------------------------------------------------------|----------------------------------|
| pUT18 <sub>CGG</sub> -virB7                    | Derivative of pUT18 <sub>CGG</sub> encoding T18-FLAG-VirB7                                                                                                                          | This study                       |
| pKNT25 <sub>GG</sub> -virB7                    | Derivative of pKNT25- <sub>GG</sub> encoding VirB7-FLAG-T25                                                                                                                         | This study                       |
| pKT25 <sub>GG</sub> -virB7                     | Derivative of pKT25 <sub>GG</sub> encoding T25-FLAG-VirB7                                                                                                                           | This study                       |
| pUT18 <sub>GG</sub> -dotB                      | Derivative of pUT18 <sub>GG</sub> encoding DotB-FLAG-T18                                                                                                                            | This study                       |
| pUT18 <sub>CGG</sub> -dotB                     | Derivative of pUT18 <sub>CGG</sub> encoding T18-FLAG-DotB                                                                                                                           | This study                       |
| pKNT25 <sub>GG</sub> -dotB                     | Derivative of pKNT25- <sub>GG</sub> encoding DotB-FLAG-T25                                                                                                                          | This study                       |
| pKT25 <sub>GG</sub> -dotB                      | Derivative of pKT25 <sub>GG</sub> encoding T25-FLAG-DotB                                                                                                                            | This study                       |
| pUT18 <sub>GG</sub> -dotO                      | Derivative of pUT18 <sub>GG</sub> encoding DotO-FLAG-T18                                                                                                                            | This study                       |
| pKNT25 <sub>GG</sub> -dotO                     | Derivative of pKNT25- <sub>GG</sub> encoding DotO-FLAG-T25                                                                                                                          | This study                       |
| pKT25 <sub>GG</sub> -dotO                      | Derivative of pKT25 <sub>GG</sub> encoding T25-FLAG-DotO                                                                                                                            | This study                       |
| pUT18 <sub>GG</sub> -icmE                      | Derivative of pUT18 <sub>GG</sub> encoding IcmE-FLAG-T18                                                                                                                            | This study                       |
| pUT18 <sub>CGG</sub> -icmE                     | Derivative of pUT18 <sub>CGG</sub> encoding T18-FLAG-IcmE                                                                                                                           | This study                       |
| pKNT25 <sub>GG</sub> -icmE                     | Derivative of pKNT25- <sub>GG</sub> encoding IcmE-FLAG-T25                                                                                                                          | This study                       |
| pKT25 <sub>GG</sub> -icmE                      | Derivative of pKT25 <sub>GG</sub> encoding T25-FLAG-IcmE                                                                                                                            | This study                       |
| <b>Constructs for promoter-reporter assays</b> |                                                                                                                                                                                     |                                  |
| pICH41021-virB2 <sub>prom</sub>                | Derivative of pICH41021 containing the putative promoter of <i>virB2</i> flanked by <i>Bsal</i> sites with ATTC and TATG overhangs for insertion into pBRM-P                        | This study                       |
| pICH41021-virB5 <sub>prom</sub>                | Derivative of pICH41021 containing the putative promoter of <i>virB5</i> flanked by <i>Bsal</i> sites with ATTC and TATG overhangs for insertion into pBRM-P                        | This study                       |
| pICH41021-virD4 <sub>prom</sub>                | Derivative of pICH41021 containing the putative promoter of <i>virD4</i> flanked by <i>Bsal</i> sites with ATTC and TATG overhangs for insertion into pBRM-P                        | This study                       |
| pICH41021-virG <sub>prom</sub>                 | Derivative of pICH41021 containing the putative promoter of <i>virG</i> flanked by <i>Bsal</i> sites with ATTC and TATG overhangs for insertion into pBRM-P                         | This study                       |
| pICH41021-dotA <sub>prom</sub>                 | Derivative of pICH41021 containing the putative promoter of <i>dotA</i> flanked by <i>Bsal</i> sites with ATTC and TATG overhangs for insertion into pBRM-P                         | This study                       |
| pICH41021-dotD <sub>prom</sub>                 | Derivative of pICH41021 containing the putative promoter of <i>dotD</i> flanked by <i>Bsal</i> sites with ATTC and TATG overhangs for insertion into pBRM-P                         | This study                       |
| pICH41021-icmL <sub>prom(229)</sub>            | Derivative of pICH41021 containing 229 bp upstream of the annotated start site of <i>icmL</i> flanked by <i>Bsal</i> sites with ATTC and TATG overhangs for insertion into pBRM-P   | This study                       |
| pICH41021-icmL <sub>prom(129)</sub>            | Derivative of pICH41021 containing 129 bp downstream of the annotated start site of <i>icmL</i> flanked by <i>Bsal</i> sites with ATTC and TATG overhangs for insertion into pBRM-P | This study                       |
| pICH41021-hrpB1 <sub>prom</sub>                | Derivative of pICH41021 containing the promoter of <i>hrpB1</i> flanked by <i>Bsal</i> sites with ATTC and TATG overhangs for insertion into pBRM-P                                 | Hausner et al., 2019             |
| pICH41021-sfgfp                                | Derivative of pICH41021 containing <i>sfgfp</i> flanked by <i>Bsal</i> sites with TATG and GGTG overhangs for insertion into pBRM                                                   | Hausner and Büttner, unpublished |
| pBRM-P+T-virB2 <sub>prom</sub> -sfgfp          | Derivative of pBRM-P+T encoding sfGFP under control of the putative <i>virB2</i> promoter                                                                                           | This study                       |
| pBRM-P+T-virB5 <sub>prom</sub> -sfgfp          | Derivative of pBRM-P+T encoding sfGFP under control of the putative <i>virB5</i> promoter                                                                                           | This study                       |
| pBRM-P+T-virD4 <sub>prom</sub> -sfgfp          | Derivative of pBRM-P+T encoding sfGFP under control of the putative <i>virD4</i> promoter                                                                                           | This study                       |
| pBRM-P+T-virG <sub>prom</sub> -sfgfp           | Derivative of pBRM-P+T encoding sfGFP under control of the putative <i>virG</i> promoter                                                                                            | This study                       |
| pBRM-P+T-dotA <sub>prom</sub> -sfgfp           | Derivative of pBRM-P+T encoding sfGFP under control of the putative <i>dotA</i> promoter                                                                                            | This study                       |
| pBRM-P+T-dotD <sub>prom</sub> -sfgfp           | Derivative of pBRM-P+T encoding sfGFP under control of the putative <i>dotD</i> promoter                                                                                            | This study                       |

|                                           |                                                                                                                                                                                                               |                                  |
|-------------------------------------------|---------------------------------------------------------------------------------------------------------------------------------------------------------------------------------------------------------------|----------------------------------|
| pBRM-P+T-icmL <sub>prom(229)</sub> -sfgfp | Derivative of pBRM-P+T encoding sfGFP under control of the putative <i>icmL</i> promoter upstream of the annotated start codon                                                                                | This study                       |
| pBRM-P+T-icmL <sub>prom(129)</sub> -sfgfp | Derivative of pBRM-P+T encoding sfGFP under control of the putative <i>icmL</i> promoter downstream of the annotated start codon                                                                              | This study                       |
| pBRM-P+T-hrpB1 <sub>prom</sub> -sfgfp     | Derivative of pBRM-P+T encoding sfGFP under control of the <i>hrpB1</i> promoter                                                                                                                              | This study                       |
| pBRM-sfgfp <sub>plac</sub>                | Derivative of pBRM encoding sfGFP under control of the <i>lac</i> promoter                                                                                                                                    | Hausner and Büttner, unpublished |
| pICH41021-virB2 <sub>prom</sub>           | Derivative of pICH41021 containing the putative promoter of <i>virB2</i> flanked by <i>Bpil</i> sites with CTCA and CGAG overhangs for fusion with <i>dTALE-2</i>                                             | This study                       |
| pICH41021-virB5 <sub>prom</sub>           | Derivative of pICH41021 containing the putative promoter of <i>virB5</i> flanked by <i>Bpil</i> sites with CTCA and CGAG overhangs for fusion with <i>dTALE-2</i>                                             | This study                       |
| pICH41021-virD4 <sub>prom</sub>           | Derivative of pICH41021 containing the putative promoter of <i>virD4</i> flanked by <i>Bpil</i> sites with CTCA and CGAG overhangs for fusion with <i>dTALE-2</i>                                             | This study                       |
| pICH41021-virG <sub>prom</sub>            | Derivative of pICH41021 containing the putative promoter of <i>virG</i> flanked by <i>Bpil</i> sites with CTCA and CGAG overhangs for fusion with <i>dTALE-2</i>                                              | This study                       |
| pICH41021-dotA <sub>prom</sub>            | Derivative of pICH41021 containing the putative promoter of <i>dotA</i> flanked by <i>Bpil</i> sites with CTCA and CGAG overhangs for fusion with <i>dTALE-2</i>                                              | This study                       |
| pICH41021-dotD <sub>prom</sub>            | Derivative of pICH41021 containing the putative promoter of <i>dotD</i> flanked by <i>Bpil</i> sites with CTCA and CGAG overhangs for fusion with <i>dTALE-2</i>                                              | This study                       |
| pICH41021-icmL <sub>prom(229)</sub>       | Derivative of pICH41021 containing a putative promoter 229 bp upstream of the annotated start codon of <i>icmL</i> flanked by <i>Bpil</i> sites with CTCA and CGAG overhangs for fusion with <i>dTALE-2</i>   | This study                       |
| pICH41021-icmL <sub>prom(129)</sub>       | Derivative of pICH41021 containing a putative promoter 129 bp downstream of the annotated start codon of <i>icmL</i> flanked by <i>Bpil</i> sites with CTCA and CGAG overhangs for fusion with <i>dTALE-2</i> | This study                       |
| pICH41021-hrpB1 <sub>prom</sub>           | Derivative of pICH41021 containing the putative promoter of <i>hrpB1</i> flanked by <i>Bpil</i> sites with CTCA and CGAG overhangs for fusion with <i>dTALE-2</i>                                             | This study                       |
| pAGM9121-virB2 <sub>prom</sub>            | Derivative of pAGM9121 containing the putative promoter of <i>virB2</i> flanked by <i>Bsal</i> sites with GGAG and CGCT overhangs                                                                             | This study                       |
| pAGM9121-virB5 <sub>prom</sub>            | Derivative of pAGM9121 containing the putative promoter of <i>virB5</i> flanked by <i>Bsal</i> sites with GGAG and CGCT overhangs                                                                             | This study                       |
| pAGM9121-virD4 <sub>prom</sub>            | Derivative of pAGM9121 containing the putative promoter of <i>virD4</i> flanked by <i>Bsal</i> sites with GGAG and CGCT overhangs                                                                             | This study                       |
| pAGM9121-virG <sub>prom</sub>             | Derivative of pAGM9121 containing the putative promoter of <i>virG</i> flanked by <i>Bsal</i> sites with GGAG and CGCT overhangs                                                                              | This study                       |
| pAGM9121-dotA <sub>prom</sub>             | Derivative of pAGM9121 containing the putative promoter of <i>dotA</i> flanked by <i>Bsal</i> sites with GGAG and CGCT overhangs                                                                              | This study                       |
| pAGM9121-dotD <sub>prom</sub>             | Derivative of pAGM9121 containing the putative promoter of <i>dotD</i> flanked by <i>Bsal</i> sites with GGAG and CGCT overhangs                                                                              | This study                       |
| pAGM9121-icmL <sub>prom(229)</sub>        | Derivative of pAGM9121 containing the putative promoter 229 bp upstream of the annotated start codon of <i>icmL</i> flanked by <i>Bsal</i> sites with GGAG and CGCT overhangs                                 | This study                       |

|                                             |                                                                                                                                                                                  |            |
|---------------------------------------------|----------------------------------------------------------------------------------------------------------------------------------------------------------------------------------|------------|
| pAGM9121-icmL <sub>prom(129)</sub>          | Derivative of pAGM9121 containing the putative promoter 129 bp downstream of the annotated start codon of <i>icmL</i> flanked by <i>BsaI</i> sites with GGAG and CGCT overhangs  | This study |
| pAGM9121-hrpB1 <sub>prom</sub>              | Derivative of pAGM9121 containing the putative promoter of <i>hrpB1</i> flanked by <i>BsaI</i> sites with GGAG and CGCT overhangs                                                | This study |
| pICH47732-virB2 <sub>prom</sub>             | Derivative of pICH47732 containing the putative promoter of <i>virB2</i> flanked by <i>BpiI</i> sites with TGCC and GCAA overhangs                                               | This study |
| pICH47732-virB5 <sub>prom</sub>             | Derivative of pICH47732 containing the putative promoter of <i>virB5</i> flanked by <i>BpiI</i> sites with TGCC and GCAA overhangs                                               | This study |
| pICH47732-virD4 <sub>prom</sub>             | Derivative of pICH47732 containing the putative promoter of <i>virD4</i> flanked by <i>BpiI</i> sites with TGCC and GCAA overhangs                                               | This study |
| pICH47732-virG <sub>prom</sub>              | Derivative of pICH47732 containing the putative promoter of <i>virG</i> flanked by <i>BpiI</i> sites with TGCC and GCAA overhangs                                                | This study |
| pICH47732-dotA <sub>prom</sub>              | Derivative of pICH47732 containing the putative promoter of <i>dotA</i> flanked by <i>BpiI</i> sites with TGCC and GCAA overhangs                                                | This study |
| pICH47732-dotD <sub>prom</sub>              | Derivative of pICH47732 containing the putative promoter of <i>dotD</i> flanked by <i>BpiI</i> sites with TGCC and GCAA overhangs                                                | This study |
| pICH47732-icmL <sub>prom(229)</sub>         | Derivative of pICH47732 containing the putative promoter 229 bp upstream of the annotated start codon of <i>icmL</i> flanked by <i>BpiI</i> sites with TGCC and GCAA overhangs   | This study |
| pICH47732-icmL <sub>prom(129)</sub>         | Derivative of pICH47732 containing the putative promoter 129 bp downstream of the annotated start codon of <i>icmL</i> flanked by <i>BpiI</i> sites with TGCC and GCAA overhangs | This study |
| pICH47732-hrpB1 <sub>prom</sub>             | Derivative of pICH47732 containing the putative promoter of <i>hrpB1</i> flanked by <i>BpiI</i> sites with TGCC and GCAA overhangs                                               | This study |
| pICH77739-virB2 <sub>prom</sub> -dTALE2     | Derivative of pICH77739 encoding dTALE-2 under control of the putative <i>virB2</i> promoter                                                                                     | This study |
| pICH77739-virB5 <sub>prom</sub> -dTALE2     | Derivative of pICH77739 encoding dTALE-2 under control of the putative <i>virB5</i> promoter                                                                                     | This study |
| pICH77739-virD4 <sub>prom</sub> -dTALE2     | Derivative of pICH77739 encoding dTALE-2 under control of the putative <i>virD4</i> promoter                                                                                     | This study |
| pICH77739-virG <sub>prom</sub> -dTALE2      | Derivative of pICH77739 encoding dTALE-2 under control of the putative <i>virG</i> promoter                                                                                      | This study |
| pICH77739-dotA <sub>prom</sub> -dTALE2      | Derivative of pICH77739 encoding dTALE-2 under control of the putative <i>dotA</i> promoter                                                                                      | This study |
| pICH77739-dotD <sub>prom</sub> -dTALE2      | Derivative of pICH77739 encoding dTALE-2 under control of the putative <i>dotD</i> promoter                                                                                      | This study |
| pICH77739-icmL <sub>prom(229)</sub> -dTALE2 | Derivative of pICH77739 encoding dTALE-2 under control of the putative <i>icmL</i> promoter                                                                                      | This study |
| pICH77739-icmL <sub>prom(129)</sub> -dTALE2 | Derivative of pICH77739 encoding dTALE-2 under control of the putative <i>icmL<sub>new</sub></i> promoter                                                                        | This study |
| pICH77739-hrpB1 <sub>prom</sub> -dTALE2     | Derivative of pICH77739 encoding dTALE-2 under control of the <i>hrpB1</i> promoter                                                                                              | This study |

<sup>1</sup> Ap, ampicillin; Gm, gentamycin; Km, kanamycin; R, resistant; Rif, rifampicin; Sm, spectinomycin; Str, streptomycin.



## References

- Adlung, N., Prochaska, H., Thieme, S., Banik, A., Blüher, D., John, P., Nagel, O., Schulze, S., Gantner, J., Delker, C., Stuttmann, J., and Bonas, U. (2016). Non-host resistance induced by the *Xanthomonas* effector XopQ is widespread within the genus *Nicotiana* and functionally depends on EDS1. *Front Plant Sci* 7, 1796.
- Battesti, A., and Bouveret, E. (2012). The bacterial two-hybrid system based on adenylate cyclase reconstitution in *Escherichia coli*. *Methods* 58, 325-334.
- Bonas, U., Stall, R.E., and Staskawicz, B. (1989). Genetic and structural characterization of the avirulence gene *avrBs3* from *Xanthomonas campestris* pv. *vesicatoria*. *Mol Gen Genet* 218, 127-136.
- Canteros, B.I. (1990). Diversity of plasmids and plasmid-encoded phenotypic traits in *Xanthomonas campestris* pv. *vesicatoria*. PhD thesis, University of Florida.
- Figurski, D., and Helinski, D.R. (1979). Replication of an origin-containing derivative of plasmid RK2 dependent on a plasmid function provided *in trans*. *Proc Natl Acad Sci USA* 76, 1648-1652.
- Hausner, J., Hartmann, N., Lorenz, C., and Büttner, D. (2013). The periplasmic HrpB1 protein from *Xanthomonas* spp. binds to peptidoglycan and to components of the type III secretion system. *Appl Environ Microbiol* 79, 6312-6324.
- Hausner, J., Jordan, M., Otten, C., Marillonnet, S., and Büttner, D. (2019). Modular cloning of the type III secretion gene cluster from the plant-pathogenic bacterium *Xanthomonas euvesicatoria*. *ACS Synth Biol* 8, 532-547.
- Kousik, C.S., and Ritchie, D.F. (1998). Response of bell pepper cultivars to bacterial spot pathogen races that individually overcome major resistance genes. *Plant Disease* 82, 181-186.
- Kovach, M.E., Elzer, P.H., Hill, D.S., Robertson, M.A., Farris, M.A., Roop II, R.M., and Peterson, K.M. (1995). Four new derivatives of the broad-host-range cloning vector pBBR1MCS, carrying different antibiotic-resistance cassettes. *Gene* 166, 175-176.
- Lorenz, C., Hausner, J., and Büttner, D. (2012). HrcQ provides a docking site for early and late type III secretion substrates from *Xanthomonas*. *PLoS ONE* 7, e51063.
- Ménard, R., Sansonetti, P.J., and Parsot, C. (1993). Nonpolar mutagenesis of the *ipa* genes defines IpaB, IpaC, and IpaD as effectors of *Shigella flexneri* entry into epithelial cells. *J Bacteriol* 175, 5899-5906.
- Murillo, J., Shen, H., Gerhold, D., Sharma, A., Cooksey, D.A., and Keen, N.T. (1994). Characterization of pPT23B, the plasmid involved in syringolide production by *Pseudomonas syringae* pv. *tomato* PT23. *Plasmid* 31, 275-287.
- Otten, C., and Büttner, D. (2021). HrpB4 from *Xanthomonas campestris* pv. *vesicatoria* acts similarly to SctK proteins and promotes the docking of the predicted sorting platform to the type III secretion system. *Cell Microbiol* 23, e13327.
- Schulze, S., Kay, S., Büttner, D., Egler, M., Eschen-Lippold, L., Hause, G., Krüger, A., Lee, J., Müller, O., Scheel, D., Szczesny, R., Thieme, F., and Bonas, U. (2012). Analyses of new type III effectors from *Xanthomonas* uncover XopB and XopS as suppressors of plant immunity. *New Phytol* 195, 894-911.
- Szczesny, R., Jordan, M., Schramm, C., Schulz, S., Coge, V., Bonas, U., and Büttner, D. (2010). Functional characterization of the Xps and Xcs type II secretion systems from the plant pathogenic bacterium *Xanthomonas campestris* pv. *vesicatoria*. *New Phytol* 187, 983-1002.
- Van den Ackerveken, G., Marois, E., and Bonas, U. (1996). Recognition of the bacterial avirulence protein AvrBs3 occurs inside the host plant cell. *Cell* 87, 1307-1316.
- Weber, E., Engler, C., Gruetzner, R., Werner, S., and Marillonnet, S. (2011). A modular cloning system for standardized assembly of multigene constructs. *PLoS ONE* 6, e16765.
- Yanisch-Perron, C., Vieira, J., and Messing, J. (1985). Improved M13 phage cloning vectors and host strains: nucleotide sequences of the M13mp18 and pUC19 vectors. *Gene* 33, 103-119.

**Table S2:** Primers used in this study.

| Name                                                       | Sequence <sup>1</sup>                                                   |
|------------------------------------------------------------|-------------------------------------------------------------------------|
| <b>Primers for the generation of expression constructs</b> |                                                                         |
| virD4-Bsa-for                                              | TTT <b>GGTCTCT</b> <i>TATG</i> TCCAAACCCAAAATCATCG                      |
| virD4-950-rev                                              | TTT <b>GGTCTCT</b> <i>AGGC</i> GAAGGTTTCATCCGCCTG                       |
| virD4-950-for                                              | TTT <b>GGTCTCT</b> <i>GCCT</i> CGATCATGGGCACCTTG                        |
| virD4-1450-rev                                             | TTT <b>GGTCTCT</b> <i>TGAC</i> GTTCTTCTTCTTGATGG                        |
| virD4-1450-for                                             | TTT <b>GGTCTCT</b> <i>GTCA</i> CCCGAGGGCGGGAAACCAC                      |
| virD4-Bsa-rev                                              | TTT <b>GGTCTCT</b> <i>CACC</i> CACTTTGATGGTAAGC                         |
| traI-pB-for                                                | TTT <b>GGTCTCT</b> <i>TATG</i> ATGCTCAATGTGACGCCGATTCCG                 |
| traI-pB-rev                                                | TTT <b>GGTCTCT</b> <i>CACC</i> GCCAAAGCGTCCGTACTCGGACG                  |
| 3751-Bsa-for                                               | TTT <b>GGTCTCT</b> <i>TATG</i> CCGACGAACTACTCAC                         |
| 3751-Bsa-rev                                               | TTT <b>GGTCTCT</b> <i>CACC</i> ACCGACGCTGCGCCCCTGGC                     |
| XCV0332-for                                                | TTT <b>GGTCTCT</b> <i>TATG</i> ACCGACGCACCGGTCATC                       |
| XCV0332-rev                                                | TTT <b>GGTCTCT</b> <i>CACC</i> GCGCGGCGGCAAACGCAG                       |
| XCV1120-for                                                | TTT <b>GGTCTCT</b> <i>TATG</i> GTGGAAGTCCGGCAAATC                       |
| XCV1120-rev                                                | TTT <b>GGTCTCT</b> <i>CACC</i> CATTGTCATCCTTG                           |
| icmE-F1_for                                                | TTT <b>GGTCTCT</b> <i>TATG</i> ATGGCTCAGCAGGAAAGCGATATC                 |
| icmE-F1-rev                                                | TTT <b>GGTCTCT</b> <i>TCGT</i> CGGAGGCCGTACTTGCGAC                      |
| icmE-F2-for                                                | TTT <b>GGTCTCT</b> <i>ACGA</i> CATGGCGGAAACCACCAG                       |
| icmE-F2-rev                                                | TTT <b>GGTCTCT</b> <i>CGTC</i> CCGCGCATGACGCTTC                         |
| icmE-F3-for                                                | TTT <b>GGTCTCT</b> <i>GACG</i> ATCGAAACCAGCGAGTTCG                      |
| icmE-F3-rev                                                | TTT <b>GGTCTCT</b> <i>CACC</i> TTTGCCGAATGCGGATGC                       |
| dotB-for                                                   | TTT <b>GGTCTCT</b> <i>TATG</i> AACGCGGTGCTCTCCGACCAG                    |
| dotB-rev                                                   | TTT <b>GGTCTCT</b> <i>CACC</i> CTCACCCTCCCCGGCCAG                       |
| dotO-F1-for                                                | TTT <b>GGTCTCT</b> <i>TATG</i> AAGATCGTCGAGCAAATCGCAGATATTG             |
| dotO-F1-rev                                                | TTT <b>GGTCTCT</b> <i>GTCT</i> TCGGTGTATTTCGATGTCCAGGTAG                |
| dotO-F2-for                                                | TTT <b>GGTCTCT</b> <i>AGAC</i> GAAACCACCTTCGTGCTCAAG                    |
| dotO-F2-rev                                                | TTT <b>GGTCTCT</b> <i>CACC</i> TGCACGGCGGTCACCTTG                       |
| dotL-F1-for                                                | TTT <b>GGTCTCT</b> <i>TATG</i> AGCATCCAGGGCGTCGACAAGC                   |
| dotL-F1-rev                                                | TTT <b>GGTCTCT</b> <i>CGGT</i> GGGGTCCTCAACCTTCCCAATG                   |
| dotL-F2-for                                                | TTT <b>GGTCTCT</b> <i>ACCG</i> AAACCTGGGAGATGATCCAAGCAAT<br>GGGCGGCGAAG |
| dotL-F2-rev                                                | TTT <b>GGTCTCT</b> <i>CCGC</i> CGGCGCTGCCGCCACCAGATACAG                 |
| dotL-F3-for                                                | TTT <b>GGTCTCT</b> <i>GCGG</i> TGGACTCAATGCTCAGCCGCAG                   |
| dotL-F3-rev                                                | TTT <b>GGTCTCT</b> <i>CACC</i> AAGCTCATTCGGCGCTCCTGAACTG                |
| virB10-for                                                 | TTT <b>GGTCTCT</b> <i>TATG</i> AGCGATCAGACCAACAAGCCGCAG                 |
| virB10-rev                                                 | TTT <b>GGTCTCT</b> <i>CACC</i> CGGGATGAACGTCACGCCGTCG                   |
| virB11-for                                                 | TTT <b>GGTCTCT</b> <i>TATG</i> TCGCAGATTGCCTCCTTC                       |
| virB11-rev                                                 | TTT <b>GGTCTCT</b> <i>CACC</i> CGCACCTGCATAGATG                         |
| XCVc0034-for                                               | TTT <b>GGTCTCT</b> <i>TATG</i> CCTAAGGCCCTCTGGACATG                     |
| XCVc0034-rev                                               | TTT <b>GGTCTCT</b> <i>CACC</i> GTGTCCGATTGGTTGTCATCC                    |
| prom4361-for                                               | TTT <b>GGTCTCT</b> <i>ATTC</i> AGGACAACGCGGTTTCGTG                      |
| prom4361-rev                                               | TTT <b>GGTCTCT</b> <i>CATA</i> GCGCGTGGCCTATGCG                         |
| Bsa-prom0160-for                                           | TTT <b>GGTCTCT</b> <i>ATTC</i> TGATCGAAGATGCTGCTG                       |
| Bsa-prom0160-rev                                           | TTT <b>GGTCTCT</b> <i>GATG</i> TGGACAGCGGCGCAG                          |
| Bsa-icmE-for-pLAND                                         | TTT <b>GGTCTCT</b> <i>CATC</i> ATGATGGCTCAGCAGGAAAGC                    |
| Gent-Bsa-for                                               | TTT <b>GGTCTCT</b> <i>TATG</i> TTACGCAGCAGCAAC                          |
| Gent-Bsa-Stop-rev                                          | TTT <b>GGTCTCT</b> <i>CACC</i> TTAGGTGGCGGTAATTG                        |

| <b>Primers for colony PCR</b>                            |                                                                       |
|----------------------------------------------------------|-----------------------------------------------------------------------|
| dotC-detect-for                                          | TTGATTTTCGGCTCCTTGCTC                                                 |
| dotC-detect-rev                                          | ATCTGGTCTGCCTGCTGCTC                                                  |
| dotB-detect-for                                          | CTTCTGGTCCATGCCAAAGC                                                  |
| dotB_detect_rev                                          | CGCGGAGGATGATCGAGATA                                                  |
| icmE-F1-for                                              | TTT <b>GGTCTCT</b> <i>TATG</i> ATGGCTCAGCAGGAAAGCGATATC               |
| icmE-F3-rev                                              | TTT <b>GGTCTCT</b> <i>CACC</i> TTTGCCGAATGCGGATGC                     |
| virB11-detect-for                                        | GAATCTCGATGACGGCGTTC                                                  |
| virB11-detect-rev                                        | GAATCTCGCCCATGATGAC                                                   |
| virB4-detect-for                                         | GTTCCAGCGCTCCCACGGTC                                                  |
| virB4-detect-rev                                         | GTGCGCGTTGTGCAACACG                                                   |
| virB10-for                                               | TTT <b>GGTCTCT</b> <i>TATG</i> AGCGATCAGACCAACAAGCCGCAG               |
| virB10-rev                                               | TTT <b>GGTCTCT</b> <i>CACC</i> CGGGATGAACGTCACGCCGTCG                 |
| virD4-detect-for                                         | GGAGAACTTCGACCTGACCA                                                  |
| virD4-detect-rev                                         | GTCCGTGAGCAGGAAGTCAT                                                  |
| avrBs3-Bsa-for                                           | TTT <b>GGTCTCT</b> <i>TATG</i> GATCCCATTCGTTT                         |
| avrBs3-Bsa-50 rev                                        | TTT <b>GGTCTCT</b> <i>GATC</i> GGACATCGTCCGCCGAGC                     |
| hpaF-seq-for                                             | CTTCAATTGACGATGGTC                                                    |
| hpaG-seq-rev                                             | CTGCATGAGGCCGATGTTTTTCAG                                              |
| pKT25/pUT18-for                                          | ACTGGAAAGCGGGCAGTGAG                                                  |
| pKT25-rev                                                | GCTGCGCAACTGTTGGGAAG                                                  |
| pUT18-rev                                                | GGTGTCGGGGCTGGCTTAAC                                                  |
| pBRM-1180-for                                            | ATGCATGCGCCAATACGCAAACCG                                              |
| pBRM-endlacZ-rev                                         | CACTCATCGCAGTCGGCCTATTG                                               |
| M13-for                                                  | GTA AAAACGACGGCCAGTG                                                  |
| M13-rev                                                  | GGAAACAGCTATGACCATG                                                   |
| pOK-mcs-for                                              | CAAACCACGTCAAATAATCAATTATG                                            |
| pOK-mcs-rev                                              | CTTGTCCTTTAACGAGGATTGTTAC                                             |
| <b>Primers for the generation of deletion constructs</b> |                                                                       |
| pXCV183-F1-for                                           | TTT <b>GGTCTCT</b> <i>CGAC</i> CCGGACAGCTCGGTTCCGGCCTTG               |
| pXCV183-F1-rev                                           | TTT <b>GGTCTCT</b> <i>ACTG</i> ATTGCACCATGCAACTAGCCCCG<br>AGCTGAAG    |
| pXCV183-F2-prom-for                                      | TTT <b>GGTCTCT</b> <i>CAGT</i> TGACATAAGCCTGTTCGGTTTCG                |
| pXCV183-F2-prom-rev                                      | TTT <b>GGTCTCT</b> <i>CGTT</i> GCTGCTCCATAACATCAAACATCG               |
| pXCV183-F3-kan-for                                       | TTT <b>GGTCTCT</b> <i>AACG</i> ATGATTGAACAAGATGGATTGCA<br>CGCAG       |
| pXCV183-F3-kan-rev                                       | TTT <b>GGTCTCT</b> <i>GAAT</i> TCAGAAGA AACTCGTCAAGAAGGC<br>GATAGAAG  |
| pXCV183-F4-promlacZ-for                                  | TTT <b>GGTCTCT</b> <i>ATTG</i> GCAGCTGGCAGCAGACAG                     |
| pXCV183-F4-GFP-rev/                                      | AAA <b>GGTCTCT</b> <i>CACC</i> TCATCATTTGTACAG                        |
| pXCV183-F5-for                                           | TTT <b>GGTCTCT</b> <i>GGTG</i> TCAGGGCGCATCGGTATCGCCACGAG             |
| pXCV183-F5-rev                                           | TTT <b>GGTCTCT</b> <i>ATGG</i> GCCGCAGCCGATACTAAGCACCTAGAG            |
| virG-pOGG2-1-for                                         | TTT <b>GGTCTCT</b> <i>CGAC</i> CCTGGTGGGACACTCCTGGGG<br>CGGCAC        |
| virG-pOGG2-1-rev                                         | TTT <b>GGTCTCT</b> <i>GGAA</i> TGCAGCTTGATCATCGACTCTCTATC             |
| virG-pOGG2-2-for                                         | TTT <b>GGTCTCT</b> <i>TTCC</i> GAGCACGCTCGATGACACAGCCGCC<br>GGCGCGAGC |
| virG-pOGG2-2-rev                                         | TTT <b>GGTCTCT</b> <i>ATGG</i> AGCAGCACGGCGCTGAAGATCGTC               |
| pOGG2-virA/C-for                                         | TTT <b>GGTCTCT</b> <i>CGAC</i> TGGAACCAGCAGTTCCAGCACG                 |
| pOGG2-virA/C-rev                                         | TTT <b>GGTCTCT</b> <i>GTGC</i> CTAGAAGTTACAACGCAGGATG                 |
| pOGG2-virA/N-for                                         | TTT <b>GGTCTCT</b> <i>GCAC</i> AGGCTGAAGAAGATCAGC                     |
| pOGG2-virA/N-rev                                         | TTT <b>GGTCTCT</b> <i>ATGG</i> CGAGCCAGGCCAGACCATCG                   |
| virB6-10-pOGG2-1-for                                     | TTT <b>GGTCTCT</b> <i>ATGG</i> TTGCAACAGCAGTTTCAGCAG                  |
| SD-virB6-10-pOGG2-1-rev                                  | TTT <b>GGTCTCT</b> <i>TGGT</i> TGTCATCCCCATAAACGTGCTTG                |

|                                                                    |                                                                |
|--------------------------------------------------------------------|----------------------------------------------------------------|
| virB6-10-pOGG2-2-for                                               | TTT <b>GGTCTCT</b> <i>ACCA</i> CGTGACGTTTCATCCC GTGAG          |
| virB6-10-pOGG2-2-rev                                               | TTT <b>GGTCTCT</b> <i>CGAC</i> GGCCAACCTTCTCAAACGGCAGC         |
| virB4-pOGG2-Bsa-FIfor                                              | TTT <b>GGTCTCT</b> <i>CGAC</i> CGCTTGGACATAGCTGTG              |
| virB4-pOGG2-Bsa-FIrev                                              | TTT <b>GGTCTCT</b> <i>GTCA</i> GTCGAACTTCTCTTTTAAAACCTC        |
| virB4-pOGG2-Bsa-FIIfor                                             | TTT <b>GGTCTCT</b> <i>TGAC</i> CATGAAAAAGACCC                  |
| virB4-pOGG2-Bsa-FIIrev                                             | TTT <b>GGTCTCT</b> <i>ATGG</i> CTATACCGCGAGCGCAAG              |
| virD4-FII-BsaI-rev                                                 | TTT <b>GGTCTCT</b> <i>CGAC</i> CGTCGCGGGTACTTGAG               |
| virD4-FII-BsaI-for                                                 | TTT <b>GGTCTCT</b> <i>TGAT</i> TGATGTCACATTTGCAG               |
| virD4-FI-BsaI-for                                                  | TTT <b>GGTCTCT</b> <i>ATCA</i> GCGCCCTTCTCCTTAGG               |
| virD4-FI-BsaI-rev                                                  | TTT <b>GGTCTCT</b> <i>ATGG</i> TGGCATGTGTCAGTTCCG              |
| virB11-pOGG2-Bsa-FII-for                                           | TTT <b>GGTCTCT</b> <i>CGAC</i> CATGAAGTCGGCCATCATC             |
| virB11-pOGG2-Bsa-FII-rev                                           | TTT <b>GGTCTCT</b> <i>GTCA</i> GGCTCGGCCCTCACGGGATG            |
| virB1-pOGG2-Bsa-FI-for                                             | TTT <b>GGTCTCT</b> <i>TGAC</i> CGGCTTTTCTCGCATGC               |
| virB1-pOGG2-Bsa-FI-rev                                             | TTT <b>GGTCTCT</b> <i>ATGG</i> GCCATCGTGTTGCGAACCTT            |
| pOGG2-icmE-F1-for                                                  | TTT <b>GGTCTCT</b> <i>CGAC</i> CCTGCCGGTACCACTGTGC             |
| pOGG2-icmE-FI-rev                                                  | TTT <b>GGTCTCT</b> <i>TTTC</i> CTGCTGAGCCATCACG                |
| pOGG2-icmE-FII-for                                                 | TTT <b>GGTCTCT</b> <i>GAAA</i> TAAAGGCTCCCCATGAAC              |
| pOGG2-icmE-FII-rev                                                 | TTT <b>GGTCTCT</b> <i>ATGG</i> CGCTTTCAGTTGGATAC               |
| pOGG2-dotCB-F1-for                                                 | TTT <b>GGTCTCT</b> <i>CGAC</i> ATGTTTGCGCCCGATAGC              |
| pOGG2-dotCB-FI-rev                                                 | TTT <b>GGTCTCT</b> <i>TCAC</i> AAACCGCCATTGCTG                 |
| pOGG2-dotCB-FII-for                                                | TTT <b>GGTCTCT</b> <i>GTGA</i> GAGGGTGAGTGATGTCAG              |
| pOGG2-dotCB-FII-rev                                                | TTT <b>GGTCTCT</b> <i>ATGG</i> GCGATCTGCGGTTACCAG              |
| <b>Primers for the amplification of predicted promoter regions</b> |                                                                |
| promvirB2-for                                                      | TTT <b>GGTCTCT</b> <i>ATTC</i> ACTATGCGGTTTATCTGGTTG           |
| promvirB2-rev                                                      | TTT <b>GGTCTCT</b> <i>CATA</i> TCTGAAACCTCTCAGATTGTTAG         |
| promvirB5-for                                                      | TTT <b>GGTCTCT</b> <i>ATTC</i> ATTGCCGACTGACGCACATCTATCG       |
| promvirB5-rev                                                      | TTT <b>GGTCTCT</b> <i>CATA</i> ATCGAAGGTCGGGATGGGGGTTCCG       |
| promvirD4-for                                                      | TTT <b>GGTCTCT</b> <i>ATTC</i> GATATCGTGTTGTGGCGATTACG         |
| promvirD4-rev                                                      | TTT <b>GGTCTCT</b> <i>CATA</i> GCGCCCTTCTCCTTAGGCTTG           |
| promvirG-for                                                       | TTT <b>GGTCTCT</b> <i>ATTC</i> GTCGGATCGGGCTGGCGACG            |
| promvirG-rev                                                       | TTT <b>GGTCTCT</b> <i>CATA</i> CGACTCTCTATCCCGGCATG            |
| promdotA-for                                                       | TTT <b>GGTCTCT</b> <i>ATTC</i> GCCTGATCTGGCCCCGGTCATC          |
| promdotA-rev                                                       | TTT <b>GGTCTCT</b> <i>CATA</i> ATTGACGAGCGCGCCACAAACG          |
| promdotD-for                                                       | TTT <b>GGTCTCT</b> <i>ATTC</i> TAGCGACACATATACGTGACCGTG        |
| promdotD-rev                                                       | TTT <b>GGTCTCT</b> <i>CATA</i> CGGGGCACGTTGCCTTTCGTTG          |
| promicmL-for                                                       | TTT <b>GGTCTCT</b> <i>ATTC</i> CCGGCATAGGTTGGACACAGG           |
| promicmL-rev                                                       | TTT <b>GGTCTCT</b> <i>CATA</i> GAACTCTGCCGGTCACTCG             |
| promicmL(129)-for                                                  | TTT <b>GGTCTCT</b> <i>ATTC</i> GTGCAATCGGTGTCCAACCTATGC        |
| promicmL(129)-rev                                                  | TTT <b>GGTCTCT</b> <i>CATA</i> TCGTCGCGCCACAACCTGTTG           |
| dTALE-pvirB2-for                                                   | <b>GAAGAC</b> AA <i>CTCA</i> GGAG ACTATGCGGTTTATCTGGTTG        |
| dTALE-pvirB2-rev                                                   | <b>GAAGAC</b> AA <i>CTCG</i> AGCG TCTGAAACCTCTCAGATTGTTAG      |
| dTALE-pvirB5-for                                                   | <b>GAAGAC</b> AA <i>CTCA</i> GGAG<br>ATTGCCGACTGACGCACATCTATCG |
| dTALE-pvirB5-rev                                                   | <b>GAAGAC</b> AA <i>CTCG</i> AGCG ATCGAAGGTCGGGATGGGGGTTCCG    |
| dTALE-virD4-for                                                    | <b>GAAGAC</b> AA <i>CTCA</i> GGAG GATATCGTGTTGTGGCGATTACG      |
| dTALE_virD4_rev                                                    | <b>GAAGAC</b> AA <i>CTCG</i> AGCG GCGCCCTTCTCCTTAGGCTTG        |
| dTALE-pvirG-for                                                    | <b>GAAGAC</b> AA <i>CTCA</i> GGAG GTCGGATCGGGCTGGCGACG         |
| dTALE-pvirG-rev                                                    | <b>GAAGAC</b> AA <i>CTCG</i> AGCG CGACTCTCTATCCCGGCATG         |
| dTALE-pdotA-for                                                    | <b>GAAGAC</b> AA <i>CTCA</i> GGAG GCCTGATCTGGCCCCGGTCATC       |
| dTALE-pdotA-rev                                                    | <b>GAAGAC</b> AA <i>CTCG</i> AGCG ATTGACGAGCGCGCCACAAACG       |
| dTALE-pdotD-for                                                    | <b>GAAGAC</b> AA <i>CTCA</i> GGAG TAGCGACACATATACGTGACCGTG     |
| dTALE-pdotD-rev                                                    | <b>GAAGAC</b> AA <i>CTCG</i> AGCG CGGGGCACGTTGCCTTTCGTTG       |

|                                                                                                                 |                                                                |
|-----------------------------------------------------------------------------------------------------------------|----------------------------------------------------------------|
| dTALE-picmL-for                                                                                                 | <b>GAAGAC</b> AA <i>CTCA</i> GGAG CCGGCATAGGTTGGACACAGG        |
| dTALE-picmL-rev                                                                                                 | <b>GAAGAC</b> AA <i>CTCG</i> AGCG GAACTCTGCCGGTCACTCG          |
| dTALE-picmL(129)_for                                                                                            | <b>GAAGAC</b> AA <i>CTCA</i> GGAG GTGCAATCGGTGTCCAACATGC       |
| dTALE-picmL(129)-rev                                                                                            | <b>GAAGAC</b> AA <i>CTCG</i> AGCG TCGTCGCGCCACAACATGTTG        |
| dTALE-phrpB1-for                                                                                                | <b>GAAGAC</b> AA <i>CTCA</i> GGAG GAATGTGTGGATGGCCT<br>GGCGAAG |
| dTALE_phrpB1-rev                                                                                                | <b>GAAGAC</b> AA <i>CTCG</i> AGCG GCGGACCGTACACGTGGGGAACG      |
| <sup>1</sup> <i>Bsa</i> I and <i>Bpi</i> I recognition sites are shown in bold, resulting overhangs in italics. |                                                                |

**Table S3:** Accession numbers and predicted functions of VirB/VirD4 proteins from *A. tumefaciens* and *x. axonopodis* pv. *citri* strain 306.

| Protein | <i>A. tumefaciens</i><br>strain GV3101<br>[NZ_KY000036.1] |     | <i>X. axonopodis</i> pv. <i>citri</i><br>strain 306<br>Chromosome [AE008923] |     | <i>X. axonopodis</i> pv. <i>citri</i><br>strain 306<br>pXAC64 [AE008925] |     | Putative function/<br>localization <sup>2</sup> |
|---------|-----------------------------------------------------------|-----|------------------------------------------------------------------------------|-----|--------------------------------------------------------------------------|-----|-------------------------------------------------|
|         | accession number <sup>1</sup>                             | aa  | accession number <sup>1</sup>                                                | aa  | accession number <sup>1</sup>                                            | aa  |                                                 |
| VirB1   | WP_010974915.1                                            | 245 | AAM37466.1                                                                   | 280 | AAM39282.1                                                               | 292 | lytic transglycosylase                          |
| VirB2   | WP_010891502.1                                            | 121 | AAM37465.1                                                                   | 136 | AAM39293.1                                                               | 125 | pilin subunit                                   |
| VirB3   | WP_010891501.1                                            | 108 | AAM37464.1                                                                   | 103 | AAM39292.1                                                               | 99  | inner membrane platform                         |
| VirB4   | WP_010974916.1                                            | 789 | AAM37463.1                                                                   | 817 | AAM39291.1                                                               | 877 | ATPase                                          |
| VirB5   | WP_010891499.1                                            | 220 | AAM37462.1                                                                   | 275 | AAM39290.1                                                               | 220 | pilus-tip protein                               |
| VirB6   | WP_010974917.1                                            | 295 | AAM37461.1                                                                   | 350 | AAM39287.1                                                               | 288 | inner membrane platform                         |
| VirB7   | WP_010891497.1                                            | 168 | AAM37471.1                                                                   | 139 | AAM39288.1                                                               | 131 | lipoprotein, outer membrane core complex        |
| VirB8   | WP_010891496.1                                            | 237 | AAM37470.1                                                                   | 348 | AAM39286.1                                                               | 224 | inner membrane platform                         |
| VirB9   | WP_010891495.1                                            | 393 | AAM37469.1                                                                   | 255 | AAM39285.1                                                               | 260 | outer membrane core complex                     |
| VirB10  | WP_010891494.1                                            | 377 | AAM37468.1                                                                   | 389 | AAM39284.1                                                               | 406 | inner/outer membrane core complex               |
| VirB11  | WP_010974918.1                                            | 344 | AAM37467.1                                                                   | 346 | AAM39283.1                                                               | 340 | ATPase                                          |
| VirD4   | WP_010974920.1                                            | 668 | AAM37472.1                                                                   | 557 | -                                                                        | -   | ATPase                                          |
| VirG    | WP_010891492.1                                            | 253 | AAM36537.1                                                                   | 124 | -                                                                        | -   | two-component system response regulator         |
| VirA    | WP_010974914.1                                            | 833 | AAM36536.1                                                                   | 676 | -                                                                        | -   | two-component system sensor kinase              |
| TraG    | -                                                         | -   | -                                                                            | -   | AAM39276.1                                                               | 524 | conjugative coupling protein TrwB               |
| TraI    | -                                                         | -   | -                                                                            | -   | AAM39277.1                                                               | 991 | conjugative relaxase TrwC                       |

<sup>1</sup> These proteins were used for the pairwise sequence alignments with corresponding proteins from *X. euvesicatoria* strain 85-10. The corresponding amino acid identities between homologous proteins are given in Fig. 1.

<sup>2</sup> See main text for details and references.

**Table S4:** Sequences of predicted *vir* and *icm/dot* promoters from *X. euvesicatoria*.

| Predicted promoter of: | Sequence (5' – 3') <sup>1</sup>                                                                                                                                                                                                                                                                            |
|------------------------|------------------------------------------------------------------------------------------------------------------------------------------------------------------------------------------------------------------------------------------------------------------------------------------------------------|
| <i>virB2</i>           | actatgCGGTTatctggttgaggCGgagcacgagagcagccGGTggtgCGgatgacggtgaagtaccacgcacaacaag<br>cttatgaggtcgttaccgCGcttgtaaaccaagctctggaacgcttgacatagctgtggaattcatcaaggagagctgcccgc<br>acacaaagaccgtgctgtagttttgcccgtagcacacctaacaatctgagaggttcaga                                                                      |
| <i>virB5</i>           | attgCGgactgacgcacatctatcGctactttgcctcacatcgcaattggcaaccaaggCGctttacgcagacaaggctctaag<br>attgggagaaatgatcagtgcccatgtggcagtgggCGgaagtacaagcattgctgtctaccagcGctccgacattcattgatac<br>CGcttaactgacttccctgttcattgctccccgaacccccatccgaccttcgat                                                                    |
| <i>virD4</i>           | gatatcgtgttgCGgattacgcgtgacgaggtgatgacccgacgCGgctggtgcatagcCGctcgtgacggatgCGggtagc<br>CGgatcagccgGatttGctctgGaccagGcaaggctgGatcGatcGctggtgGagagcGagagcGgCGgacGcaagtc<br>gagctgtcGaccataagcCGgctgctgctgctgctgacccGcatcGtatgcaagcctaaggagaaggCGc                                                             |
| <i>virG</i>            | gCGgatcGGgctGGcagCGggtcCGctccctaccCGtGtGtcGcagagcGagtgGctGgtcacaagatGaacaaaagtcGt<br>catcGaccacGGcagCGgagcGtgaccaccCGctcGtcGacGtgGcaagCGacacaaaacacCGtagcatcGtGctGgaagat<br>gCGtccccCGacGGctatcGtgGacCGcGcatgGacGcacttccccaacCGgctGattcGgtcaccCGagCGgatcG<br>acactCGgaatcGtccCGaacCGgtcGatcCGggatagagagtcG |
| <i>dotA</i>            | gcctgatctgcccGgtatccGGCGgCGgagcCGaccagCGatcGGgctaagagtgGctcccGatccacagtcGagttctcG<br>gCctatccatgacGctgaccaagtcCCcagttccGGgGcataactacGccagaactcGacgagctgggggGtCGgaggtcta<br>gCGcagccatGtcacatccGtcaatatagttatGccttagtttaacatcGtttGtggCGcGctGtcaat                                                           |
| <i>dotD</i>            | tagcGacacatacGtgaccGtgacagagcCGcctGtcacatcGttcGcatatagcGacGcGagtacacGGtggaagtcG<br>gGtGccgagtgGtgatGtgctGtgGGggGtgattGcagagatacGGCGgataacctGcGccacaaatGtGtGtaatccatG<br>ccacGtattcaaccaacGaaaggcaacGtgccccG                                                                                                |
| <i>icmL229</i>         | ccGGcataggttgacacagCGcCGcaacagctgatttctagtgatttGcGCGgtGcttCGcGacGtccatcacttGgtGCGgt<br>aagtcagtgaaGtgatgaccGctgtagcactcGcGgataagtagCGcCGcGctacatcGtggaatggacGtccagcagctGct<br>gatGtGCGcCGgtGtgaccGcataaaGGcCGcCGcGagtgaccGGcagagttc                                                                        |
| <i>icmL129</i>         | gtGcaatcGgtGtccaactatcCGgttctccccagCGcaaaGGccacattcGttGgcatatcGttgacCGcctGttatGgtGctGt<br>atcctcGtgaacgatttccaaacagttGtgCGcGacga                                                                                                                                                                           |

<sup>1</sup> Predicted *vir* boxes are indicated in yellow.

**Table S5:** Accession numbers and predicted functions of Icm/Dot proteins from *L. pneumophila*.

| Protein   | <i>L. pneumophila</i> strain <i>Philadelphia1</i><br>[NC002942.5] |      | Putative function/ localization <sup>2</sup> |
|-----------|-------------------------------------------------------------------|------|----------------------------------------------|
|           | accession number <sup>1</sup>                                     | aa   |                                              |
| DotA      | WP_010948386.1                                                    | 1048 | inner membrane protein                       |
| DotB      | WP_011947587.1                                                    | 369  | ATPase                                       |
| DotC      | WP_010948375.1                                                    | 303  | lipoprotein, outer membrane core complex     |
| DotD      | WP_010948374.1                                                    | 163  | lipoprotein, outer membrane core complex     |
| IcmT      | WP_010946190.1                                                    | 86   | inner membrane protein                       |
| IcmW      | WP_010948388.1                                                    | 151  | cytoplasmic chaperon                         |
| IcmP/DotM | WP_011214699.1                                                    | 376  | inner membrane protein                       |
| IcmO/DotL | WP_010946195.1                                                    | 783  | ATPase                                       |
| IcmL/DotI | WP_010946198.1                                                    | 212  | inner membrane protein                       |
| IcmK/DotH | WP_015444826.1                                                    | 360  | periplasmic                                  |
| IcmE/DotG | WP_010946200.1                                                    | 1048 | inner membrane protein                       |
| IcmG/DotF | WP_010946201.1                                                    | 269  | inner/outer membrane core complex            |
| IcmC/DotE | WP_010946202.1                                                    | 194  | inner membrane protein                       |
| IcmD/DotP | WP_011214707.1                                                    | 132  | inner membrane protein                       |
| IcmJ/DotN | WP_011214708.1                                                    | 208  | cytoplasmic                                  |
| IcmB/DotO | WP_010946205.1                                                    | 1009 | cytoplasmic                                  |

<sup>1</sup> These proteins were used for the pairwise sequence alignments with corresponding proteins from *X. euvesicatoria* strain 85-10. The corresponding amino acid identities between homologous proteins are given in Fig. 2.

<sup>2</sup> See main text for details and references.



**Table S6:** Transfer of plasmid pXCV38<sub>82-8</sub>::*spec*<sup>R</sup> from strain 82-8 into the recipient strain 85-10::*gent*<sup>R</sup>.

| <b>Donor</b>                                                                           |                        | <b>Recipient</b>                 |                        | <b>Transconjugant<sup>1</sup></b>                                                      |                         |                |
|----------------------------------------------------------------------------------------|------------------------|----------------------------------|------------------------|----------------------------------------------------------------------------------------|-------------------------|----------------|
| Strain                                                                                 | CFU                    | Strain                           | CFU                    | Strain                                                                                 | CFU                     | % of recipient |
| 82-8<br>pXCV38 <sub>82-8</sub> :: <i>spec</i> <sup>R</sup>                             | 5 × 10 <sup>8</sup>    | 85-10:: <i>gent</i> <sup>R</sup> | 5 × 10 <sup>8</sup>    | 85-10:: <i>gent</i> <sup>R</sup><br>pXCV38 <sub>82-8</sub> :: <i>spec</i> <sup>R</sup> | 3.59 × 10 <sup>5</sup>  | 0.072          |
|                                                                                        | 6.45 × 10 <sup>8</sup> |                                  | 6.45 × 10 <sup>8</sup> |                                                                                        | 1.343 × 10 <sup>7</sup> | 2.08           |
|                                                                                        | 7.05 × 10 <sup>8</sup> |                                  | 7.05 × 10 <sup>8</sup> |                                                                                        | 8.23 × 10 <sup>6</sup>  | 1.17           |
|                                                                                        |                        |                                  |                        |                                                                                        |                         |                |
| 85-10:: <i>gent</i> <sup>R</sup><br>pXCV38 <sub>82-8</sub> :: <i>spec</i> <sup>R</sup> | 5.55 × 10 <sup>8</sup> | 85-10:: <i>kan</i> <sup>R</sup>  | 5.55 × 10 <sup>8</sup> | 85-10:: <i>kan</i> <sup>R</sup><br>pXCV38 <sub>82-8</sub> :: <i>spec</i> <sup>R</sup>  | 44.000                  | 0.008          |
|                                                                                        | 5.52 × 10 <sup>8</sup> |                                  | 5.52 × 10 <sup>8</sup> |                                                                                        | 41.500                  | 0.008          |
|                                                                                        | 4.56 × 10 <sup>8</sup> |                                  | 4.56 × 10 <sup>8</sup> |                                                                                        | 35.600                  | 0.008          |

<sup>1</sup> Transconjugants were selected on NYG plates containing rifampicin, gentamycin and spectinomycin. The presence of plasmid pXCV38<sub>82-8</sub>::*spec*<sup>R</sup> was confirmed by agarose gel electrophoresis and PCR (see text). Numbers represent the numbers of transconjugants obtained in three independent conjugation experiments using the listed donor and recipient strains.

**Table S7:** XVIPCDs in T4S candidate substrates from *X. euvesicatoria*.

| Protein | Amino acid sequence <sup>1</sup>                                                                                                                                                                                                                                                                                                                                                                                                                                                                                                                                                                                                                                                                                                                                                                                                                                                                                                                                                                                                                                                                                                                                                                                                                                                                                                                                                                 |
|---------|--------------------------------------------------------------------------------------------------------------------------------------------------------------------------------------------------------------------------------------------------------------------------------------------------------------------------------------------------------------------------------------------------------------------------------------------------------------------------------------------------------------------------------------------------------------------------------------------------------------------------------------------------------------------------------------------------------------------------------------------------------------------------------------------------------------------------------------------------------------------------------------------------------------------------------------------------------------------------------------------------------------------------------------------------------------------------------------------------------------------------------------------------------------------------------------------------------------------------------------------------------------------------------------------------------------------------------------------------------------------------------------------------|
| XCV0332 | MTDAPVIHQGPVGPDPHPEHPDHYLFAQIREAVSVLDAELGKPVDAQSERMAARLLPLA<br>KQHGFQVDYVVLRSRHLGVEGENVFLVVRGELS <sup>1</sup> DPAHLRAH <sup>1</sup> ITTQEAMETSV <sup>1</sup> DASLAQ<br>LEEINRRLMLRLPPR                                                                                                                                                                                                                                                                                                                                                                                                                                                                                                                                                                                                                                                                                                                                                                                                                                                                                                                                                                                                                                                                                                                                                                                                           |
| XCV1120 | MEVRQIGKGRAGQPDIEPQAVASNEAVLADNPAHPDHSTYQQIHSWVRGTGNWNEEE<br>SKNVTASLYKQQTEDPLLKRVDQVTGGLGRDGAHNVFAVYAPHGMGVAPMFHAHV <sup>1</sup><br>DGRQAAQEPAAQNLQQAQAEAIQQTQVROQVLEQTQQQNVQQEQGPRMTM                                                                                                                                                                                                                                                                                                                                                                                                                                                                                                                                                                                                                                                                                                                                                                                                                                                                                                                                                                                                                                                                                                                                                                                                          |
| XCV3751 | MPTNYSRAQVLDIIEREA <sup>1</sup> AERNIPRDDFLRFAHVETGGAFDELASRGGGAKGLFQFTP<br>PTAQQYGIAGRELDVANTDAAARLYLDNRTSLVNRHERDGRPYLSGKPEPDGLDMY<br>LAHQQGAGGYRSLQTAIATGSFGLESTRANILNNVGEKELKSLTGVSATFRRMSDKD<br>MAQTFVQYWDTKMDRIRIPEKGIPISTTQQAPSHAAPAHSAPAQPEKPAAQGI <sup>1</sup> ALHAA<br>YDLTNKYDHVKYGLGAKDPDKGRVDCSGWV <sup>1</sup> VEMQ <sup>1</sup> NATMDEINKGAGKAI <sup>1</sup> FTKDEKF<br>SPGFDSASELLRKAELRSGVLIQ <sup>1</sup> GKDVTAQTLKEGMIIGEDNGPQSWDKGRYK <sup>1</sup> GIDHIT<br>MVVRDPKDGQLKISQSRGGEGVELSSLD <sup>1</sup> SYLERK <sup>1</sup> HAKGVKLYASDPLSEARDLLQERS<br>QNKQ <sup>1</sup> QSHAATEHKPSQA <sup>1</sup> HAAADAPGVLENARGA <sup>1</sup> EVRTLQQT <sup>1</sup> LQQLGYK <sup>1</sup> DAGGNEL<br>KADGAYGQRTSEAVKAFQRAHGLQDDGVVGRDTQAALKQAEKTPLLSEKTNPDHPLF<br>NQAVNKLEQLGPNAFANRQQLVNAAGHMTFEAKVSGMQRIDMV <sup>1</sup> AQSKDGNGLFAV <sup>1</sup><br>QGQPTDPAHQRIYTDKATAAERPLEQSSNAVRQEAQTQTQVVDQHEQQR <sup>1</sup> SRQGRSVG                                                                                                                                                                                                                                                                                                                                                                                                                                                          |
| TraI    | MLNVTPIRGNNQYAAAHYFSAADDYYAKEHPGEWQGGQAQALGLTG <sup>1</sup> PVEQAQLSRL<br>LDGQLP <sup>1</sup> NGERIQTTFDPTDNKKRMGLDLTFSAPKSVSMQALVAGDKDV <sup>1</sup> TAAHDRAVT<br>RALEQVERLAEARKKVKGSYRERTANMVIGKFRHEMSRAKDPQLH <sup>1</sup> THAVVLNMTQ<br>RADGAWRALSNEDIFRVQHEVDALYKAELARGLQALGYAIRLVDDQGNFELDHISRD<br>QIEAFSARSRVIEEALANEGKTRATATTLEKQIISLATRPRKDESREL <sup>1</sup> VKQYWVEKSRE<br>LGIDYGLRSQLDGRTYEAGDSFGTRGRERGDAGDRIAATSLPASLTPAQAVVQYAINH<br>LTEREAVVRETALTATALRRAVGLAGPDEVRAEIKRLAGQGALIEAVPAYRMADRKD<br>GPALSSAGWKS <sup>1</sup> YLQELKGWSDKQAQ <sup>1</sup> QYVGN <sup>1</sup> AIKQGS <sup>1</sup> LVPAEKRYTTQKALAREKAIL<br>AIERTGRGAIEPIMTAAAVKTALEGTALSAGQ <sup>1</sup> RS <sup>1</sup> AVETIVSTKNRFVGIQGDAGTGKTY<br>TVNQAV <sup>1</sup> ALIKQASAVSEGYRTVALAPYGNQVKALKNEGLEAHTLASFLRTKDKPIDGK<br>TIIVLDES <sup>1</sup> GVGARQMEQVMRVVEKAGARMVLLGDTKQTEAIEAGKPF <sup>1</sup> AQLQDGM<br>QTARISEIQRQKDH <sup>1</sup> ELKTAVEHAAEGRVTPSLAHIKHVEELKEPIERHRAIVNDYIQLTE<br>PERRETLIVAGTNEARREINRMVRQSLDLTGKGR <sup>1</sup> EFETLTRVDMTQAQRRFAPS <sup>1</sup> YQPG<br>MVIQPEKDDQKAGLTRGETYRVKDALPGNALVLQRQDGT <sup>1</sup> TTINPRKATQLSVYRLER<br>AELSVGDTV <sup>1</sup> RINRNDPGRDLTNGDRMRVAGVIGGVKLESVEQRDGRPARALELPTN<br>RPLHLEHAYASTVHSAQGLTNDRALIALD <sup>1</sup> TNSRTTSMNLYYVAISRACHEARVYTNSV<br>KELPAAIARRFDKTTALAIQRERQLQRDAGM <sup>1</sup> PKGAADGKQALQRQFQQQRKQPA<br>SGKKPSEYGRFG |

<sup>1</sup>Conserved amino acid sequences of the XVIPCD are indicated as follows: GLxRIDHV in yeqlflow, FAVQGxxDPAHxRAHV in green and the glutamine-rich C-terminal tail in purple.

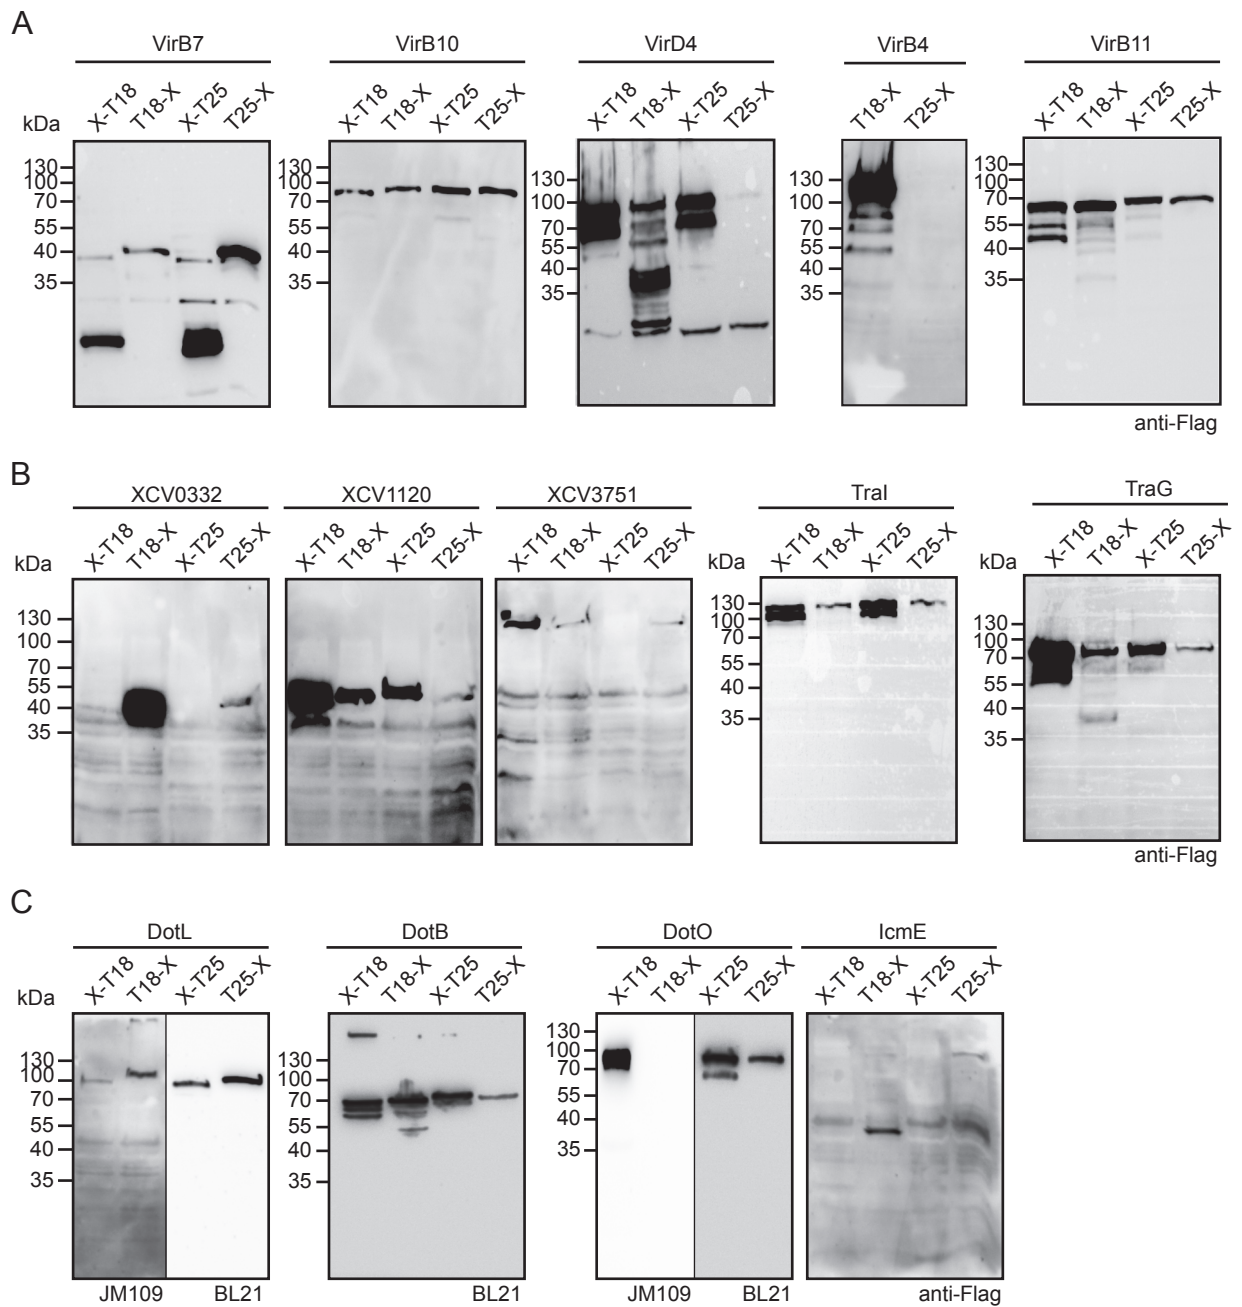

Figure S1  
Drehkopf et al.

**Figure S1:** Synthesis and immunological detection of T18 and T25 fusion proteins in *E. coli* strain JM109.

A) Immunological detection of VirB fusion proteins. Cell extracts from *E. coli* strain JM109 with expression constructs encoding T18 and T25 fusions of VirB7, VirB10, VirB4, VirB11 and VirD4 as indicated were analysed by immunoblotting, using a FLAG epitope-specific antibody. Asterisks mark signals at the expected size of the fusion proteins. Additional signals likely correspond to degradation products or result from unspecific binding of the antibody to proteins in the cell extracts.

B) Analysis of T18 and T25 fusions of candidate T4S substrates and TraG. Cell extracts of *E. coli* strain JM109 containing expression constructs for the synthesis of T18 and T25 fusions of XCV0332, XCV1120, XCV3571, TraI and TraG as indicated were analysed by immunoblotting as described in (A). Proteins at the expected size are indicated by asterisks. Note that XCV0332-T18, XCV0332-T25 and XCV3751-T25 were not detectable.

C) Immunological detection of T18 and T25 fusions of Icm and Dot proteins. JM109 cell extracts containing expression constructs for the synthesis of T18 and T25 fusions of DotL, DotB, DotO and IcmE were analysed by immunoblotting as described in (A). Proteins at the expected size of the fusions are indicated with asterisks. Additional signals likely correspond to degradation products or protein complexes in case of DotB, which were not dissolved during SDS-PAGE. Note that T18-DotO and IcmE-T18 were not detectable.

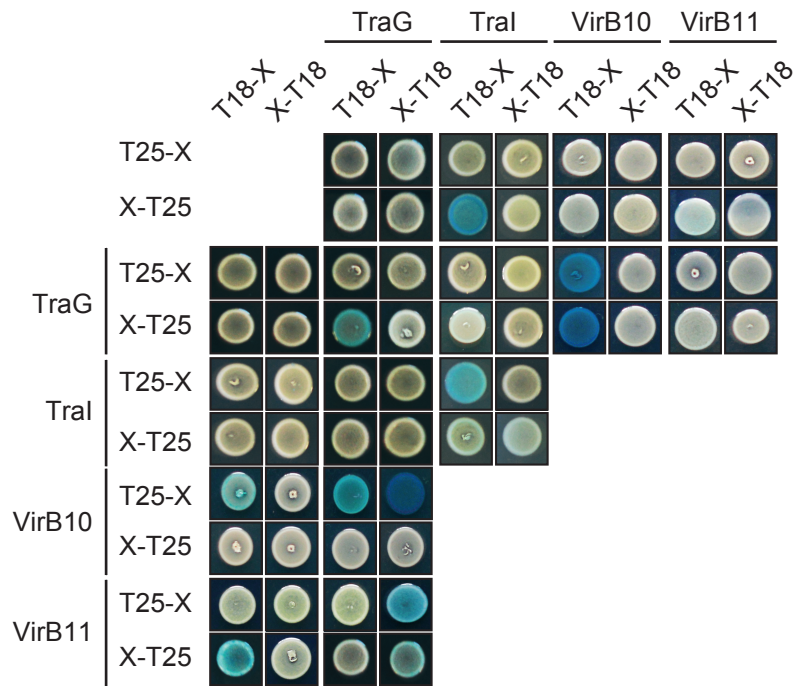

Figure S2  
Drehkopf et al.

**Figure S2:** Results of BACTH assays with TraG from *X. euvesicatoria*.

T18 and T25 fusions of TraG, the predicted ATPase VirB11, the structural component VirB10 and the putative relaxase TraI were analysed in *E. coli* BTH101 cells as indicated and bacterial cultures were grown on indicator plates containing X-gal and IPTG. As control, fusion proteins were tested against the T18 or T25 domain alone as indicated. All proteins were stably synthesized as was shown by immunoblot analysis of bacterial cell extracts, using a FLAG epitope-specific antibody (see Fig. S1). Interaction studies were performed at least three times with similar results. One representative colony is shown. Results are summarized in Table 2.
